# Supplementary material
Source: publisher site journal article supplement (https://www.dovepress.com/article/285795)
Supplement: Supplementary file 1 [file get_supplementary_file.php]

**Appendix:**

| If my family has difficulty weaning from the ventilator, does he/she need to undergo tracheostomy? |
| --- |
| **Indications of receiving tracheostomy patient group:**  1. A patient is on an endotracheal tube who cannot be weaned from the ventilator.  2. A patient is on an endotracheal tube who has inadequate cough function to clean his sputum properly.  3. A patient is on an endotracheal tube whose upper airway obstruction is noted. |
| **Introduction of tracheostomy:**   - An artificial airway is usually an emergency treatment. When a patient has difficulty breathing, the patient often receives endotracheal tube intubation with a ventilator to assist ventilation and to maintain life. However, not all patients can be weaned from the ventilator successfully. - Long-term endotracheal tube intubation can cause damage to the mouth, throat, and trachea, such as oral mucosal damage, oral mucosa edema, tooth damage, vocal cord edema or paralysis, trachea granuloma formation, difficulty swallowing, tracheal malacia, tracheal esophageal fistula, etc. - Tracheostomy is a surgical procedure which sets up a temporary or permanent opening between the second and third tracheal cartilage on the neck and followed by putting a tracheostomy tube to provide the patient breathing and clean the patient's sputum. |

| Four steps of tracheostomy decision-making program |
| --- |
| **Step 1. Compare the advantages, risks, adverse effects, complications, costs, and alternatives of each treatment option.**   |  | Endotracheal tube | tracheostomy | | --- | --- | --- | | Degree of comfort | Need to open the mouth and bite the tube for 24 hours (low comfort). | The tubing does not pass through the mouth, and the patient can open the mouth freely (high comfort). | | Oral hygiene | The tube is long-term friction of the oral mucosa and can easily cause inflammation or ulceration of the oral mucosa. It is not easy to clean the mouth. | The tube is not over the mouth and causes no friction to the oral mucosa. It is easy to clean the mouth and improve oral hygiene. | | Safety of the artificial airway | When an endotracheal tube is detached, the physician needs to use a laryngoscope and other relevant equipment to re-intubate. | When a tracheostomy tube is detached, the trachea opening is present, and an experienced nurse can immediately put the tracheostomy tube into place. | | Ventilator-associated pneumonia | Relatively high risk of ventilator-associated pneumonia | Relatively low risk of ventilator-associated pneumonia | | Eat from mouth | Can only be fed through the nasogastric tube | Patient can be trained to swallow and eat from the mouth. | | Speak training | Patient is impossible to speak. | Patient can speak through the speaking valve tracheostomy tube. | | Risk of artificial airway | The endotracheal tube may not be placed smoothly if the upper airway is structural abnormal, and thus induces difficulties in intubating. | Anesthesia and surgery are required. Related risks: hemorrhage, subcutaneous emphysema, pneumothorax, and mediastinal emphysema (all <1%) | | How to treat the risk of artificial airway | If the endotracheal tube cannot place in time, an emergency tracheostomy needs to perform | Most can cure after conservative treatment | | Wound over the body | 1. Frequency of oral ulcers 2. No neck wound | There is a 2 cm in size stoma on the neck, and the stoma can heal after removing the tracheostomy tube. | | Long term care places | Difficult care at home or nursing home | Not difficult care at home or nursing home | | Successfully weaning off the ventilator | Breathing is more laborious and may affect successfully weaning off the ventilator. | Increasing weaning off the ventilator in some clinical reports. | | Costs | Health insurance benefits. | Health insurance benefits. | | Long-term survival rates | Same as tracheostomy | Same as an endotracheal tube | |

| **Step 2: when choosing a treatment, participants were asked about the factors they concern about and the degree of each concern.**  **Please circle the following considerations: 0 is not important, 5 is the most important.**   | Considerations | not important | less important | normal | important | very important | the most important. | | --- | --- | --- | --- | --- | --- | --- | | Patient’s willingness | 0 | 1 | 2 | 3 | 4 | 5 | | Patient’s comfort | 0 | 1 | 2 | 3 | 4 | 5 | | Patient can eat or speak | 0 | 1 | 2 | 3 | 4 | 5 | | Patient can be discharged and return home | 0 | 1 | 2 | 3 | 4 | 5 | | Opinion of friends and relatives | 0 | 1 | 2 | 3 | 4 | 5 | | Maintain the integrity of the patient's neck surgery | 0 | 1 | 2 | 3 | 4 | 5 | | Patient survival time | 0 | 1 | 2 | 3 | 4 | 5 | | Possible complications of the tracheostomy | 0 | 1 | 2 | 3 | 4 | 5 | | Possible complications of the endotracheal tube intubation | 0 | 1 | 2 | 3 | 4 | 5 | | Cost of treatment | 0 | 1 | 2 | 3 | 4 | 5 |     **Step 3: How much does the patient or family know about the treatment?**   | questions | right | wrong | unclear | | --- | --- | --- | --- | | 1. After a tracheostomy, it increases the patient's comfort. | □ | □ | □ | | 2. After a tracheostomy, it decreases oral ulcers and improves oral hygiene. | □ | □ | □ | | 3. After a tracheostomy, it is more convenient to clean the sputum in the airway. | □ | □ | □ | | 4. After a tracheostomy, it is possible to eat or speak | □ | □ | □ | | 5. After a tracheostomy, it increases the chance of weaning from the ventilator | □ | □ | □ | | 6. After a tracheostomy, the patient should be able to be weaned from the ventilator | □ | □ | □ | | 7. After a tracheostomy, the incidence of pneumonia and mortality will decrease. | □ | □ | □ | | 8. After a tracheostomy, it is safer to replace the artificial airway | □ | □ | □ | | 9. Tracheostomy will prolong the patient's disease course and increase the burden on the family. | □ | □ | □ | | 10.Tracheostomy will increase patient pain and shorten the individual’s life. | □ | □ | □ | | 11.After a tracheostomy, the tube cannot be removed permanently | □ | □ | □ | | 12.After a tracheostomy, the patient will be bed-ridden for life. | □ | □ | □ |  | **Step 4: Is the patient or family now confirming the treatment method?**  □ I (we) have confirmed the treatment method that I want - (the following one)  □ Undergo tracheostomy  □ maintain endotracheal tube intubation  □ I (we) still cannot decide which I want to use the treatment method–(the following one)  □ I (we) want to discuss details with the attending physician or medical staff  □ I (we) want to discuss the pros and cons with other relatives and friends  I (we) can decide on ___________ (date).  □ For the above treatment methods, I (we) want to know more details and my problems are: | | --- | |
| --- | --- | --- | --- | --- | --- | --- | --- | --- | --- | --- | --- | --- | --- | --- | --- | --- | --- | --- | --- | --- | --- | --- | --- | --- | --- | --- | --- | --- | --- | --- | --- | --- | --- | --- | --- | --- | --- | --- | --- | --- | --- | --- | --- | --- | --- | --- | --- | --- | --- | --- | --- | --- | --- | --- | --- | --- | --- | --- | --- | --- | --- | --- | --- | --- | --- | --- | --- | --- | --- | --- | --- | --- | --- | --- | --- | --- | --- | --- | --- | --- | --- | --- | --- | --- | --- | --- | --- | --- | --- | --- | --- | --- | --- | --- | --- | --- | --- | --- | --- | --- | --- | --- | --- | --- | --- | --- | --- | --- | --- | --- | --- | --- | --- | --- | --- | --- | --- | --- | --- | --- | --- | --- | --- | --- | --- | --- | --- | --- | --- | --- |
